# Supplementary material for: Nano-phase separation and structural ordering in silica-rich mixed network former glasses
Source: Royal Society of Chemistry journal article supplement (doi:10.1039/c8cp01728j), 2018-01-01
Supplement: c8cp01728j1.pdf [file c8cp01728j1.pdf]

## Electronic Supplementary Information for Nano-Phase Separation and Structural Ordering in Silica-Rich Mixed Network Former Glasses

Hao Liu,<sup>a,b</sup> Randall E. Youngman,<sup>c</sup> Saurabh Kapoor,<sup>b</sup> Lars R. Jensen,<sup>d</sup> Morten M. Smedskjaer<sup>b</sup> and  
Yuanzheng Yue<sup>a,b\*</sup>

<sup>a</sup> State Key Laboratory of Silicate Materials for Architectures, Wuhan University of Technology, Wuhan 430070, China

<sup>b</sup> Department of Chemistry and Bioscience, Aalborg University, 9200 Aalborg, Denmark

<sup>c</sup> Science and Technology Division, Corning Incorporated, Corning, New York 14831, United States

<sup>d</sup> Department of Materials and Production, Aalborg University, 9220 Aalborg, Denmark

\* Corresponding author. E-mail: [yy@bio.aau.dk](mailto:yy@bio.aau.dk)

### Contents

1. **Table S1.** Three-fold coordinated boron speciation and NMR parameters as determined from deconvolution of <sup>11</sup>B MAS NMR spectra.
2. **Table S2.** Four-fold coordinated boron populations and  $\delta_{CS}$  (chemical shift) for the two resolved B<sup>IV</sup> resonances determined from deconvolution of <sup>11</sup>B MAS NMR spectra.
3. **Table S3.** Site populations and NMR parameters for Al, as determined using DMFit deconvolution of <sup>27</sup>Al MAS NMR data.
4. **Table S4.** Fitting parameters which describe P speciation in this series of glasses.
5. **Figure S1.** <sup>11</sup>B MAS NMR spectra of B16 and B30 glasses and their respective fits.
6. **Figure S2.** <sup>27</sup>Al MAS NMR spectra of B16 and B30 glasses.
7. **Figure S3.** <sup>31</sup>P MAS NMR spectra and Gaussian fits (shaded curve) for B16 and B30 glasses.

**Table S1.** Three-fold coordinated boron speciation and NMR parameters as determined from deconvolution of  $^{11}\text{B}$  MAS NMR spectra. Uncertainties in isotropic chemical shift ( $\delta_{\text{CS}}$ ), quadrupolar coupling constant ( $C_Q$ ), quadrupolar asymmetry parameter ( $\eta_Q$ ) and intensity (Int.) are no more than  $\pm 0.5$  ppm,  $\pm 0.1$  MHz,  $\pm 0.1$  and  $\pm 2\%$ , respectively.  $\eta_Q$  was constrained to these tabulated values to facilitate fitting of the data.  $C_Q$  was also constrained to 2.70 MHz for the ring  $\text{B}^{\text{III}}$  resonance.

| Glass ID   | ring $\text{B}^{\text{III}}$  |                |                 |             | non-ring $\text{B}^{\text{III}}$ |                |                 |             | $\text{B}^{\text{III}}(\text{P NNN})$ |                |                 |             |
|------------|-------------------------------|----------------|-----------------|-------------|----------------------------------|----------------|-----------------|-------------|---------------------------------------|----------------|-----------------|-------------|
|            | $\delta_{\text{CS}}$<br>(ppm) | $C_Q$<br>(MHz) | $\eta_Q$<br>(-) | Int.<br>(%) | $\delta_{\text{CS}}$<br>(ppm)    | $C_Q$<br>(MHz) | $\eta_Q$<br>(-) | Int.<br>(%) | $\delta_{\text{CS}}$<br>(ppm)         | $C_Q$<br>(MHz) | $\eta_Q$<br>(-) | Int.<br>(%) |
| <b>B16</b> | 17.4                          | 2.7            | 0.1             | 4.6         | 13.3                             | 2.66           | 0.2             | 44.7        | 11.6                                  | 2.49           | 0.2             | 23.9        |
| <b>B22</b> | 17.5                          | 2.7            | 0.1             | 9.5         | 13.5                             | 2.67           | 0.2             | 44.6        | 11.7                                  | 2.48           | 0.2             | 24.6        |
| <b>B24</b> | 17.6                          | 2.7            | 0.1             | 11.9        | 13.6                             | 2.68           | 0.2             | 43.0        | 11.8                                  | 2.48           | 0.2             | 24.4        |
| <b>B26</b> | 17.6                          | 2.7            | 0.1             | 14.3        | 13.6                             | 2.68           | 0.2             | 43.0        | 11.8                                  | 2.47           | 0.2             | 23.3        |
| <b>B28</b> | 17.6                          | 2.7            | 0.1             | 17.0        | 13.7                             | 2.69           | 0.2             | 41.6        | 11.8                                  | 2.48           | 0.2             | 22.8        |
| <b>B30</b> | 17.6                          | 2.7            | 0.1             | 19.7        | 13.8                             | 2.70           | 0.2             | 40.6        | 11.8                                  | 2.47           | 0.2             | 22.2        |

**Table S2.** Four-fold coordinated boron populations and  $\delta_{\text{CS}}$  for the two resolved  $\text{B}^{\text{IV}}$  resonances determined from deconvolution of  $^{11}\text{B}$  MAS NMR spectra in this series of glasses. Uncertainties in  $\delta_{\text{CS}}$  and Int. are no more than  $\pm 0.2$  ppm and  $\pm 2\%$ , respectively.

| Glass ID   | $\text{B}^{\text{IV}}(4\text{P})$ |             | $\text{B}^{\text{IV}}(\text{P},\text{Si})$ |             | Total $\text{N}_4$<br>(%) |
|------------|-----------------------------------|-------------|--------------------------------------------|-------------|---------------------------|
|            | $\delta_{\text{CS}}$<br>(ppm)     | Int.<br>(%) | $\delta_{\text{CS}}$<br>(ppm)              | Int.<br>(%) |                           |
| <b>B16</b> | -4.2                              | 22.0        | -2.1                                       | 4.8         | 26.8                      |
| <b>B22</b> | -4.2                              | 16.9        | -2.0                                       | 4.4         | 21.3                      |
| <b>B24</b> | -4.2                              | 16.4        | -2.0                                       | 4.2         | 20.6                      |
| <b>B26</b> | -4.2                              | 15.4        | -2.0                                       | 4.0         | 19.4                      |
| <b>B28</b> | -4.2                              | 14.5        | -2.0                                       | 4.1         | 18.6                      |
| <b>B30</b> | -4.3                              | 13.7        | -2.0                                       | 3.8         | 17.5                      |

**Table S3.** Site populations and NMR parameters for Al, as determined using DMFit deconvolution of  $^{27}\text{Al}$  MAS NMR data. Uncertainties in  $\delta_{\text{CS}}$ ,  $C_Q$ , and Int. are no more than  $\pm 1$  ppm,  $\pm 0.2$  MHz, and  $\pm 2.5\%$ , respectively.

| Glass ID   | $\text{Al}^{\text{IV}}$       |                |             | $\text{Al}^{\text{V}}$        |                |             | $\text{Al}^{\text{VI}}$       |                |             |
|------------|-------------------------------|----------------|-------------|-------------------------------|----------------|-------------|-------------------------------|----------------|-------------|
|            | $\delta_{\text{CS}}$<br>(ppm) | $C_Q$<br>(MHz) | Int.<br>(%) | $\delta_{\text{CS}}$<br>(ppm) | $C_Q$<br>(MHz) | Int.<br>(%) | $\delta_{\text{CS}}$<br>(ppm) | $C_Q$<br>(MHz) | Int.<br>(%) |
| <b>B16</b> | 41.0                          | 5.09           | 76          | 9.4                           | 5.61           | 21          | -19.3                         | 2.59           | 3           |
| <b>B22</b> | 40.8                          | 4.88           | 78          | 9.3                           | 5.49           | 19          | -19.3                         | 2.16           | 3           |
| <b>B24</b> | 40.8                          | 4.84           | 80          | 9.5                           | 5.60           | 18          | -19.3                         | 2.12           | 2           |
| <b>B26</b> | 40.7                          | 4.82           | 81          | 9.5                           | 5.60           | 17          | -19.2                         | 2.19           | 2           |
| <b>B28</b> | 40.7                          | 4.78           | 81          | 9.6                           | 5.55           | 17          | -18.9                         | 2.14           | 2           |
| <b>B30</b> | 40.6                          | 4.75           | 81          | 10.2                          | 6.03           | 17          | -18.8                         | 2.13           | 2           |

**Table S4.** Fitting parameters which describe P speciation in this series of glasses. Uncertainties in  $\delta_{\text{CS}}$  and full width at half maximum (FWHM) are both on the order of  $\pm 0.5$  ppm.

| Glass ID   | $\delta_{\text{CS}}$<br>(ppm) | FWHM<br>(ppm) |
|------------|-------------------------------|---------------|
| <b>B16</b> | -34.0                         | 15.9          |
| <b>B22</b> | -33.6                         | 15.9          |
| <b>B24</b> | -33.6                         | 15.9          |
| <b>B26</b> | -33.6                         | 15.9          |
| <b>B28</b> | -33.4                         | 16.1          |
| <b>B30</b> | -33.6                         | 15.9          |

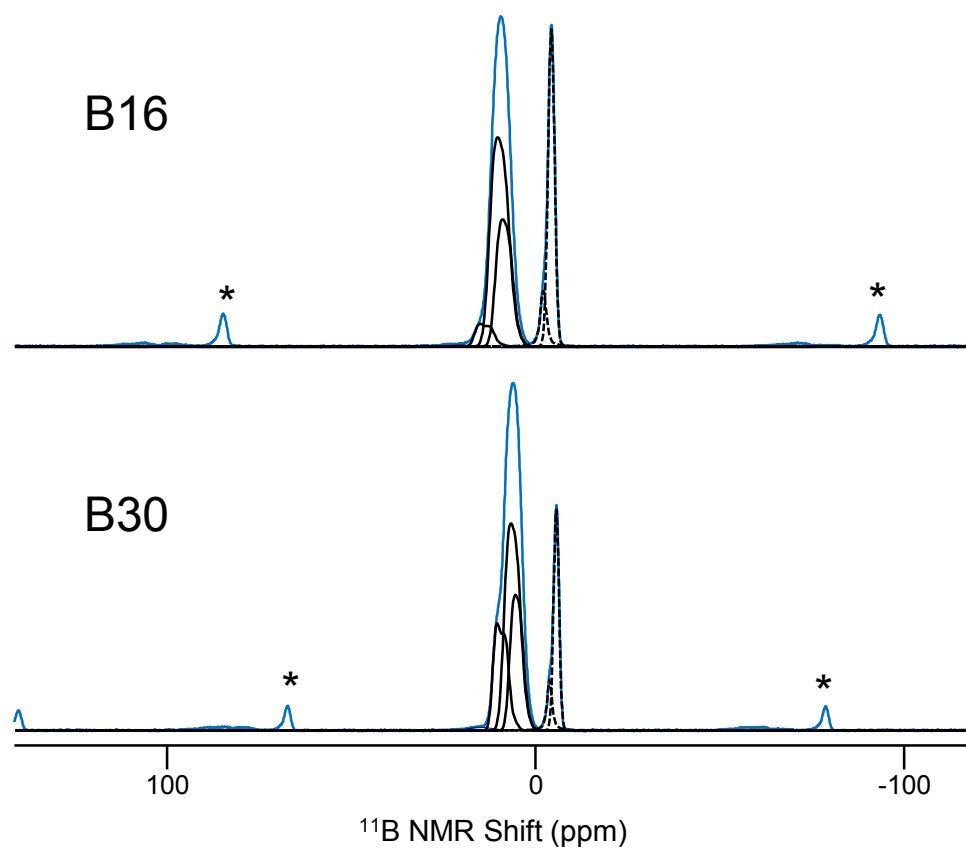

**Figure S1.**  $^{11}\text{B}$  MAS NMR spectra of B16 and B30 glasses and their respective fits. Blue lines represent the experimental data. Dashed and solid black curves show the two  $\text{B}^{\text{IV}}$  peaks and three  $\text{B}^{\text{III}}$  resonances, respectively. Asterisks mark the position of sidebands, which were considered in all fits of these data.

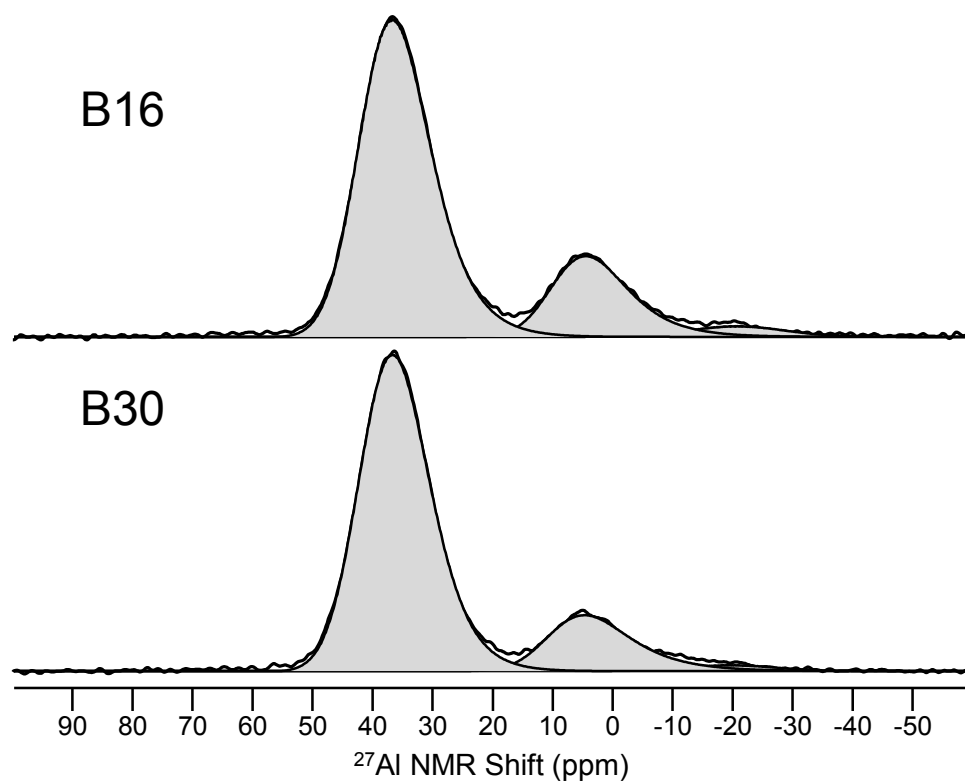

**Figures S2.**  $^{27}\text{Al}$  MAS NMR spectra of B16 and B30 glasses, with fitting of resonances from  $\text{Al}^{\text{IV}}$ ,  $\text{Al}^{\text{V}}$  and  $\text{Al}^{\text{VI}}$  species (shaded curves).

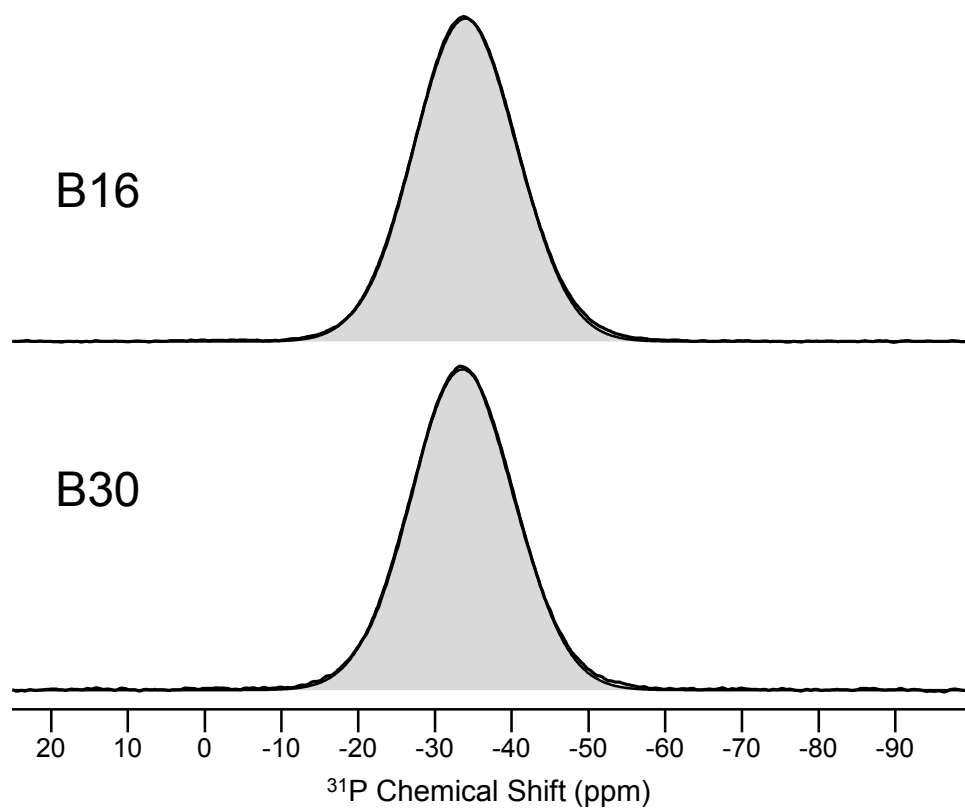

**Figure S3.**  $^{31}\text{P}$  MAS NMR spectra and Gaussian fits (shaded curve) for B16 and B30 glasses.
